# Supplementary material
Source: Springer Nature journal article supplement (https://www.springermedizin.de/resource/supplementary/13032_2011_56_MOESM1_ESM.pdf/9651540)
Supplement: MOESM1 [file 9651540]

19,582  
Patients With Data

\* 5 also DOA

Exclude age <15 years N=203\*

19,380

Exclude DOA and ED DOA N=223

19,157

Exclude discharge home and probability of survival=0 N=55

19,102

Exclude probability of survival or ISS missing N=125

18,977

Exclude ISS=0 and probability of survival=0 N=58

18,918  
Included in the  
Analysis
